# Psychiatric Services

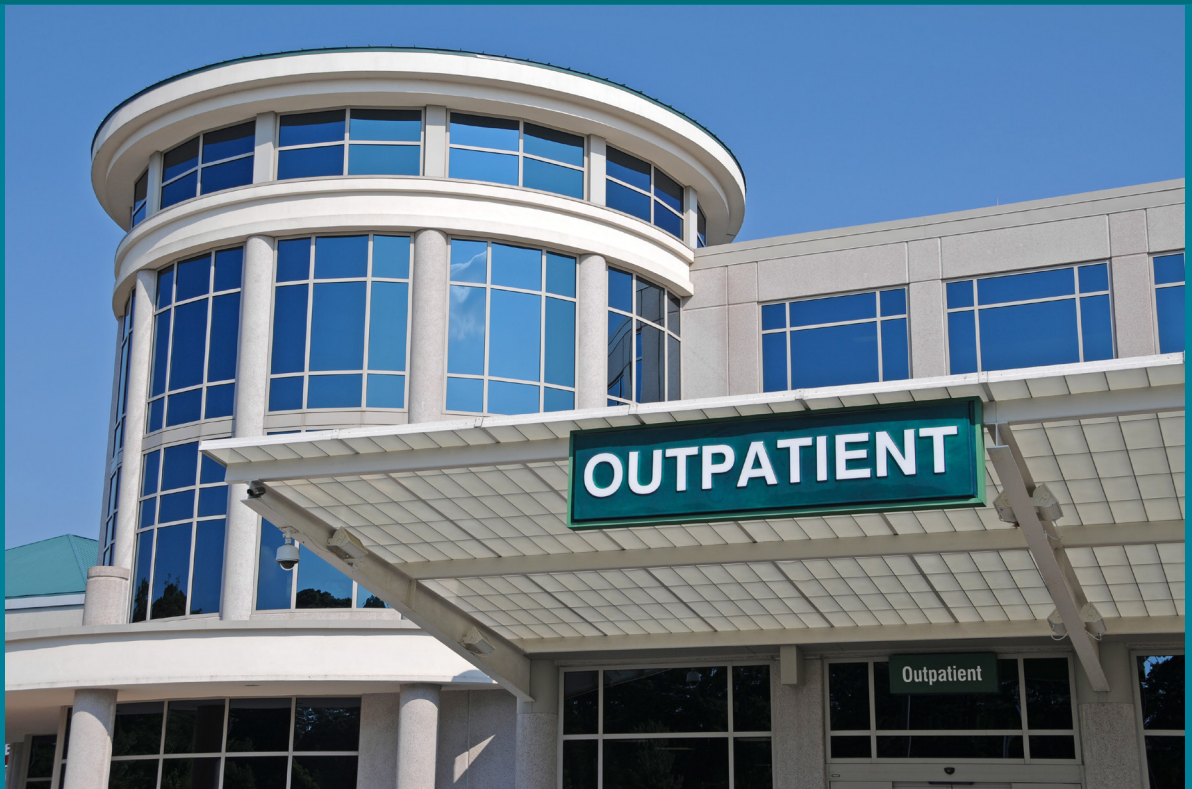

Reduced hospitalization with AOT, with or without ACT

Association of suicide mortality with 5 mental health conditions

The treatment gap for borderline personality disorder

Understanding religiously reinforced mental health stigma

AMERICAN  
PSYCHIATRIC  
ASSOCIATION

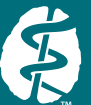

[ps.psychiatryonline.org](http://ps.psychiatryonline.org)
