# EDITOR'S CHOICE

## Psychiatric Services

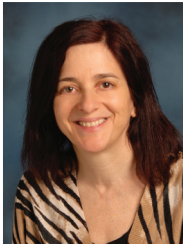

Lisa B. Dixon, M.D., M.P.H.

Collections curated by Lisa B. Dixon, M.D., M.P.H., and the Early-Career Psychiatrist Advisory Committee

Each collection will focus on one topic—summarizing for the researcher, clinician, and policy analyst the latest information and seminal research available from *Psychiatric Services*.

- Recovery
- Peer Support
- Perinatal Psychiatry
- Homelessness
- Mental health disparities, by race-ethnicity

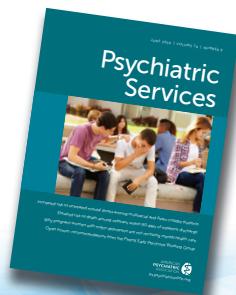

Sign up for Editor's Choice alert at <http://appi.org/etocs>.

Visit [ps.psychiatryonline.org/editorschoice](http://ps.psychiatryonline.org/editorschoice)

AMERICAN  
PSYCHIATRIC  
ASSOCIATION  
PUBLISHING

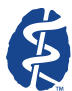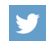

Follow @APAPubPsychSvcs

[appi.org](http://appi.org) • Email: [appi@psych.org](mailto:appi@psych.org) • Toll-Free: 1-800-368-5777

AH1927A

# PERFECT FIT

## JOIN THE TEAM

- Largest and most exciting mental health department in the country
- Many avenues for advancement
- Flexible hours and unparalleled work-life balance
- Competitive salary with potential bonuses of up to **\$32,000 annually**
- Student loan repayment incentive of up to **\$250,000**
- Reimbursement of eligible relocation costs of up to **\$15,000**

**LOS ANGELES COUNTY DEPARTMENT OF MENTAL HEALTH**

[www.psychiatristjobs.la](http://www.psychiatristjobs.la)

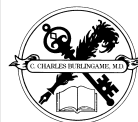

## Call for Nominations

The Institute of Living/Hartford Hospital is pleased to announce that nominations are now being accepted for the 2020 C. Charles Burlingame Award. This award, honoring an outstanding leader in psychiatric education, research or administration, is made in the memory of Dr. Burlingame, psychiatrist-in-chief from 1931 to 1950.

We invite you to nominate a person who has significantly advanced the field of psychiatry. The nomination must include a current curriculum vitae and two letters of support describing the candidate's achievements.

The Institute of Living is a comprehensive behavioral health system for the evaluation and treatment of psychiatric and addiction disorders. We offer a full continuum of services to patients and remain committed to the highest standards of clinical care, research and education.

### Past Recipients

- |                                       |                                   |
|---------------------------------------|-----------------------------------|
| 1988 Robert Kellner, M.D., Ph.D.      | 2004 David H. Barlow, Ph.D.       |
| 1989 William T. Carpenter, Jr., M.D.  | 2005 Herbert D. Kleber, M.D.      |
| 1990 Dennis P. Cantwell, M.D.         | 2006 Daniel N. Stern, M.D.        |
| 1991 George E. Vaillant, M.D.         | 2007 Jerrold F. Rosenbaum, M.D.   |
| 1992 A. John Rush, M.D.               | 2008 K. Ranga Rama Krishnan, M.D. |
| 1993 John C. Nemiah, M.D.             | 2009 David J. Kupfer, M.D.        |
| 1994 Maurice J. Martin, M.D.          | 2010 Professor Sir Michael Rutter |
| 1995 Otto F. Kernberg, M.D.           | 2011 Jeffrey A. Lieberman, M.D.   |
| 1996 Charles P. O'Brien, M.D., Ph.D.  | 2012 Judith L. Rapoport, M.D.     |
| 1997 Glen Owen Gabbard, M.D.          | 2013 Nora D. Volkow, M.D.         |
| 1998 Lissy F. Jarvik, M.D., Ph.D.     | 2014 Daniel R. Weinberger, M.D.   |
| 1999 Nancy C. Andreasen, M.D., Ph.D.  | 2015 David A. Brent, M.D.         |
| 2000 Lewis L. Judd, M.D.              | 2016 Steven S. Sharfstein, M.D.   |
| 2001 Paul S. Appelbaum, M.D.          | 2017 Harold Alan Pincus, M.D.     |
| 2002 Charles B. Nemeroff, M.D., Ph.D. | 2018 Kenneth S. Kendler, M.D.     |
| 2003 Dilip V. Jeste, M.D.             | 2019 Max Fink, M.D.               |

Institute of Living

A Division of Hartford Hospital

Nominations should be sent no later than December 5, 2019 to:  
Harold I. Schwartz, M.D.  
Psychiatrist-in-Chief Emeritus  
The Institute of Living/Hartford Hospital  
200 Retreat Ave., Hartford, CT 06106  
or e-mailed to  
[Kathleen.Day@hhchealth.org](mailto:Kathleen.Day@hhchealth.org)



*Ariella, an artist, musician, and real person living with schizophrenia*

SCHIZOPHRENIA  
DIAGNOSIS

EXPERIENCED  
SIDE EFFECTS

STARTED  
COLLEGE

STARTED  
MEDICATION

STOPPED  
MEDICATION

G  
R  
A  
D  
U  
A  
T  
I  
O  
N

# Schizophrenia shouldn't derail her life

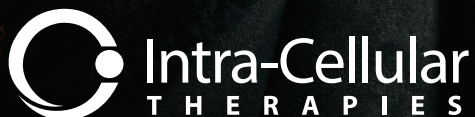

BUILT ON NOBEL PRIZE-WINNING SCIENCE

Visit [SZJourney.com](http://SZJourney.com) to learn more
